# Supplementary material for: A scoping review of portable sensing for out-of-lab anterior cruciate ligament injury prevention and rehabilitation
Source: PubMed Central journal article supplement (PMC10024704; doi:10.1038/s41746-023-00782-2), 2023-03-18
Supplement: 41746_2023_782_MOESM1_ESM.pdf [file 41746_2023_782_MOESM1_ESM.pdf]

Supplementary Table 1 The Appraisal tool for Cross-Sectional Studies (AXIS).

| No. | Question                                                                                                                                               | Category                |
|-----|--------------------------------------------------------------------------------------------------------------------------------------------------------|-------------------------|
| Q1  | Were the aims/objectives of the study clear?                                                                                                           | Quality of reporting    |
| Q2  | Was the study design appropriate for the stated aim(s)?                                                                                                | Quality of study design |
| Q3  | Was the sample size justified?                                                                                                                         | Quality of study design |
| Q4  | Was the target/reference population clearly defined? (Is it clear who the research was about?)                                                         | Quality of reporting    |
| Q5  | Was the sample frame taken from an appropriate population base so that it closely represented the target/reference population under investigation?     | Quality of study design |
| Q6  | Was the selection process likely to select subjects/participants that were representative of the target/reference population under investigation?      | Potential biases        |
| Q7  | Were measures undertaken to address and categorise non-responders?                                                                                     | Potential biases        |
| Q8  | Were the risk factor and outcome variables measured appropriate to the aims of the study?                                                              | Quality of study design |
| Q9  | Were the risk factor and outcome variables measured correctly using instruments/ measurements that had been trialled, piloted or published previously? | Potential biases        |
| Q10 | Is it clear what was used to determined statistical significance and/or precision estimates? (eg, p values, CIs)                                       | Quality of reporting    |
| Q11 | Were the methods (including statistical methods) sufficiently described to enable them to be repeated?                                                 | Quality of reporting    |
| Q12 | Were the basic data adequately described?                                                                                                              | Quality of reporting    |
| Q13 | Does the response rate raise concerns about non-response bias?                                                                                         | Potential biases        |
| Q14 | If appropriate, was information about non-responders described?                                                                                        | Potential biases        |
| Q15 | Were the results internally consistent?                                                                                                                | Potential biases        |
| Q16 | Were the results for the analyses described in the methods, presented?                                                                                 | Quality of reporting    |
| Q17 | Were the authors' discussions and conclusions justified by the results?                                                                                | Quality of study design |
| Q18 | Were the limitations of the study discussed?                                                                                                           | Quality of reporting    |
| Q19 | Were there any funding sources or conflicts of interest that may affect the authors' interpretation of the results?                                    | Quality of study design |
| Q20 | Was ethical approval or consent of participants attained?                                                                                              | Quality of study design |
